# Supplementary material for: A Novel Cell Vertex Model Formulation that Distinguishes the Strength of Contraction Forces and Adhesion at Cell Boundaries
Source: Frontiers journal article supplement (doi:10.3389/fphy.2021.704878), 2021-07-22
Supplement: Table_1.DOC [file Table_1.DOC]

Table 1. Summary of parameters used in the present paper

Parameter [dimensiona] Meaning Typical value

[F/L3] Constant corresponding to the bulk modulus of cells 4 [N/m3]

[L2] Preferred area of each epithelial cell 2.2 [m2]

　[L] Preferred cell perimeter of each epithelial cell 5.3 [m]

[F/L] Degree of conservation of cell perimeter 50 [N/m]

[F/L] Contribution from to the force on the cell edge 1 [N/m2]

[1/T] Degree of conservation of total in each cell 0.05 [1/sec]

[F] Contraction force on the cell boundary (present model) 0.1 [N]b

[F] Line tension on the cell boundary (previous model) 0.1 [N] b

[F･T/L] Frictional constant at the vertex (present model) 1 [Nsec/m]

[F･T/L] Frictional constant at the vertex (previous model) 100 [Nsec/m]

[T] Relaxation time for 10 [sec]

[L] Preferred length of total in each cell 6.3 [m]

a Dimensions are represented by [L] (for length; m), [T] (for time; 100 sec), [F] (for force; N). b This value refers to those obtained in the existing work [Bambardekar K, Clément R, Blanc O, Chardès C, Lenne PF. Direct laser manipulation reveals the mechanics of cell contacts in vivo. *Proc Natl Acad Sci U S A.* (2015) 112, 1416-21].
